# Supplementary material
Source: publisher site journal article supplement (https://www.dovepress.com/article/593724)
Supplement: Supplementary file 1 [file 593724%20Supplementary%20Material.docx]

Supplementary Material


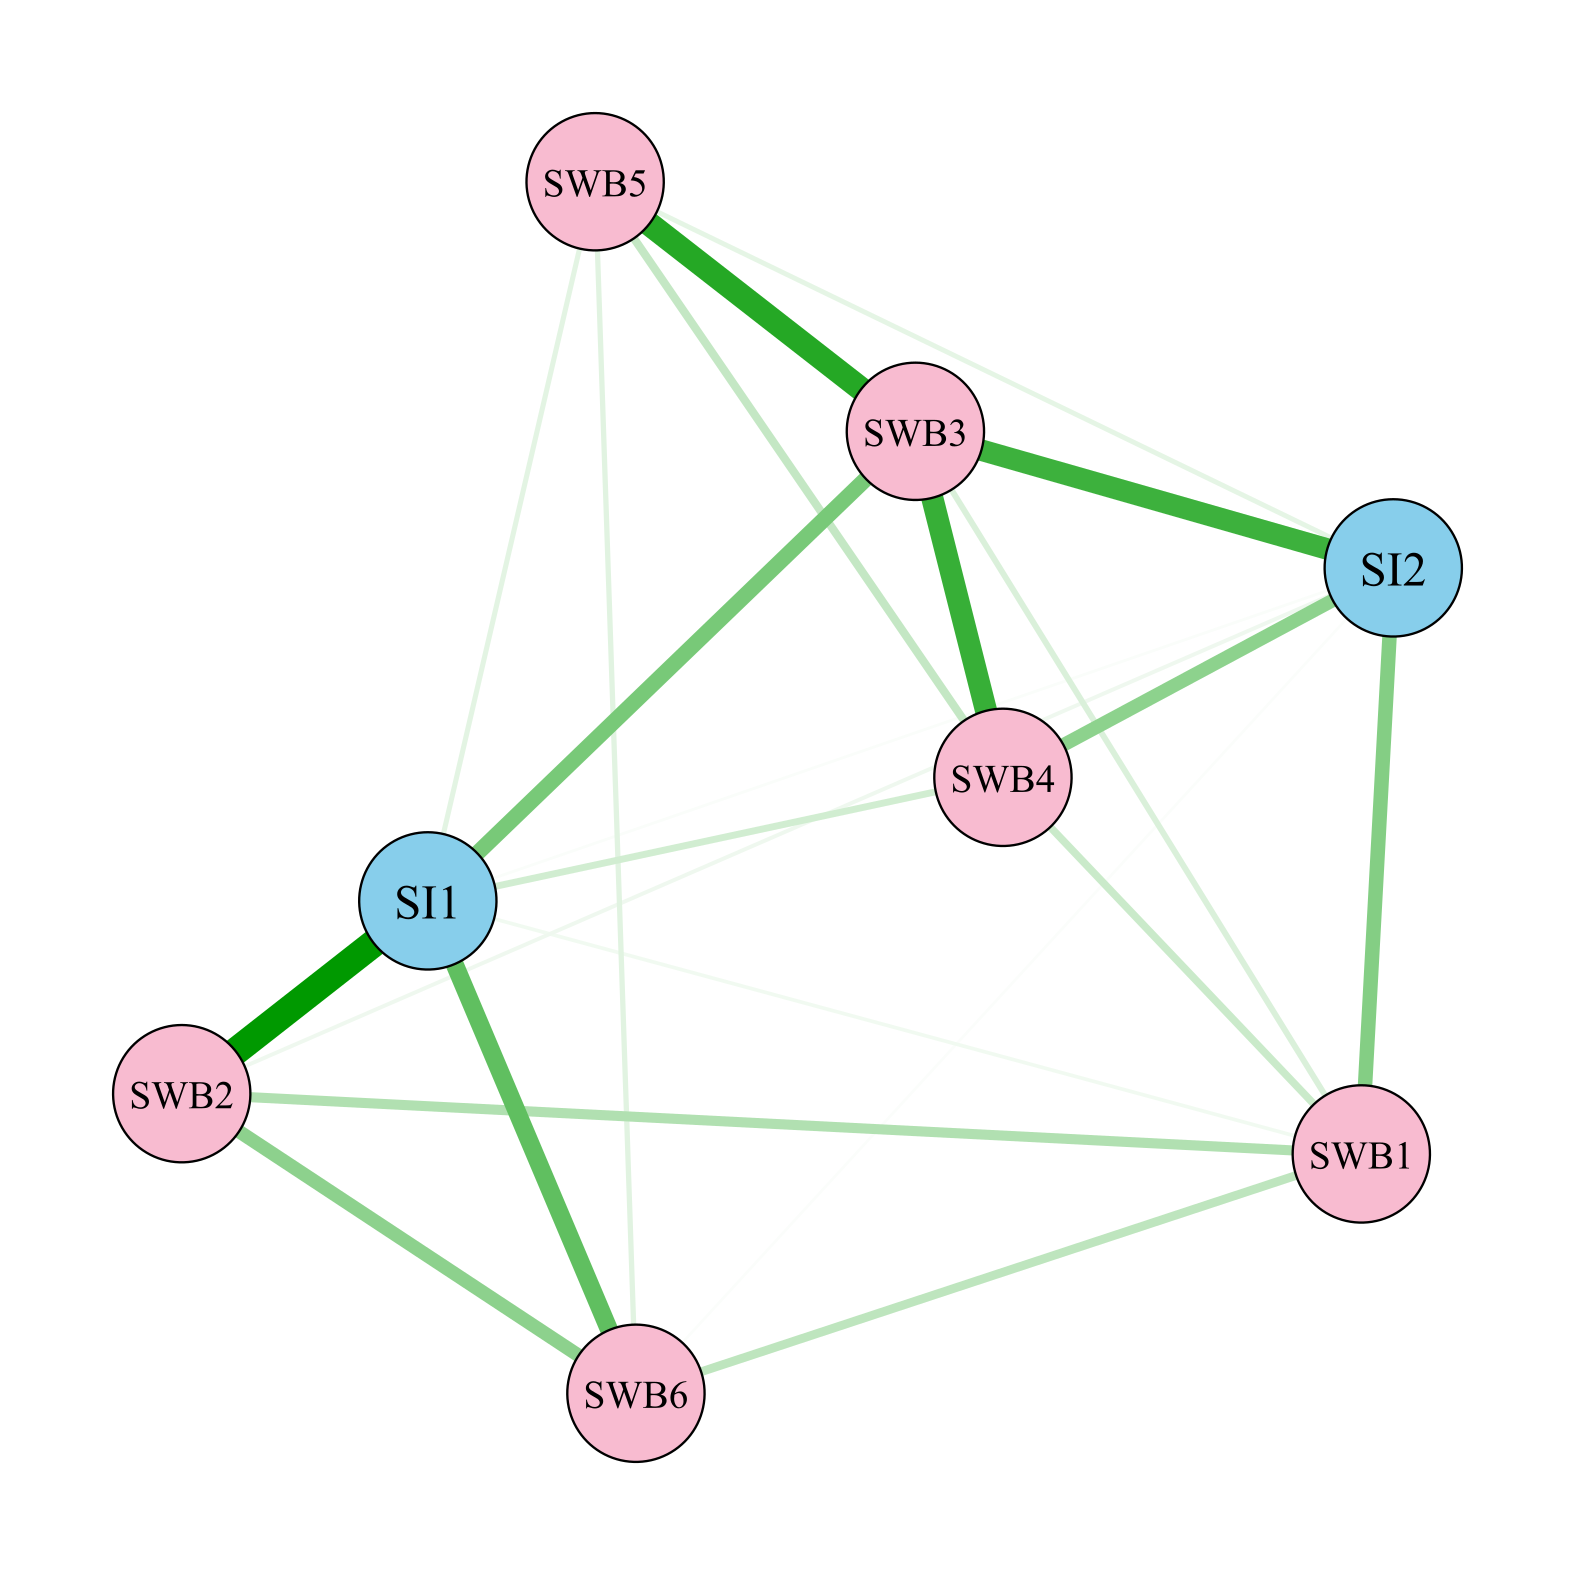


Supplementary Figure 1: Network structure of social integration and subjective well-being among young and middle-aged male patients with lymphoma.

Notes: SI1: Daily integration,SI2: Intimate integration;SWB1: Energy, SWB2: Relaxed or tense,SWB3: Depressed or happy mood,SWB4: Control over emotions or behaviors,SWB5: Health concerns,SWB6: Satisfaction with or interest in life.


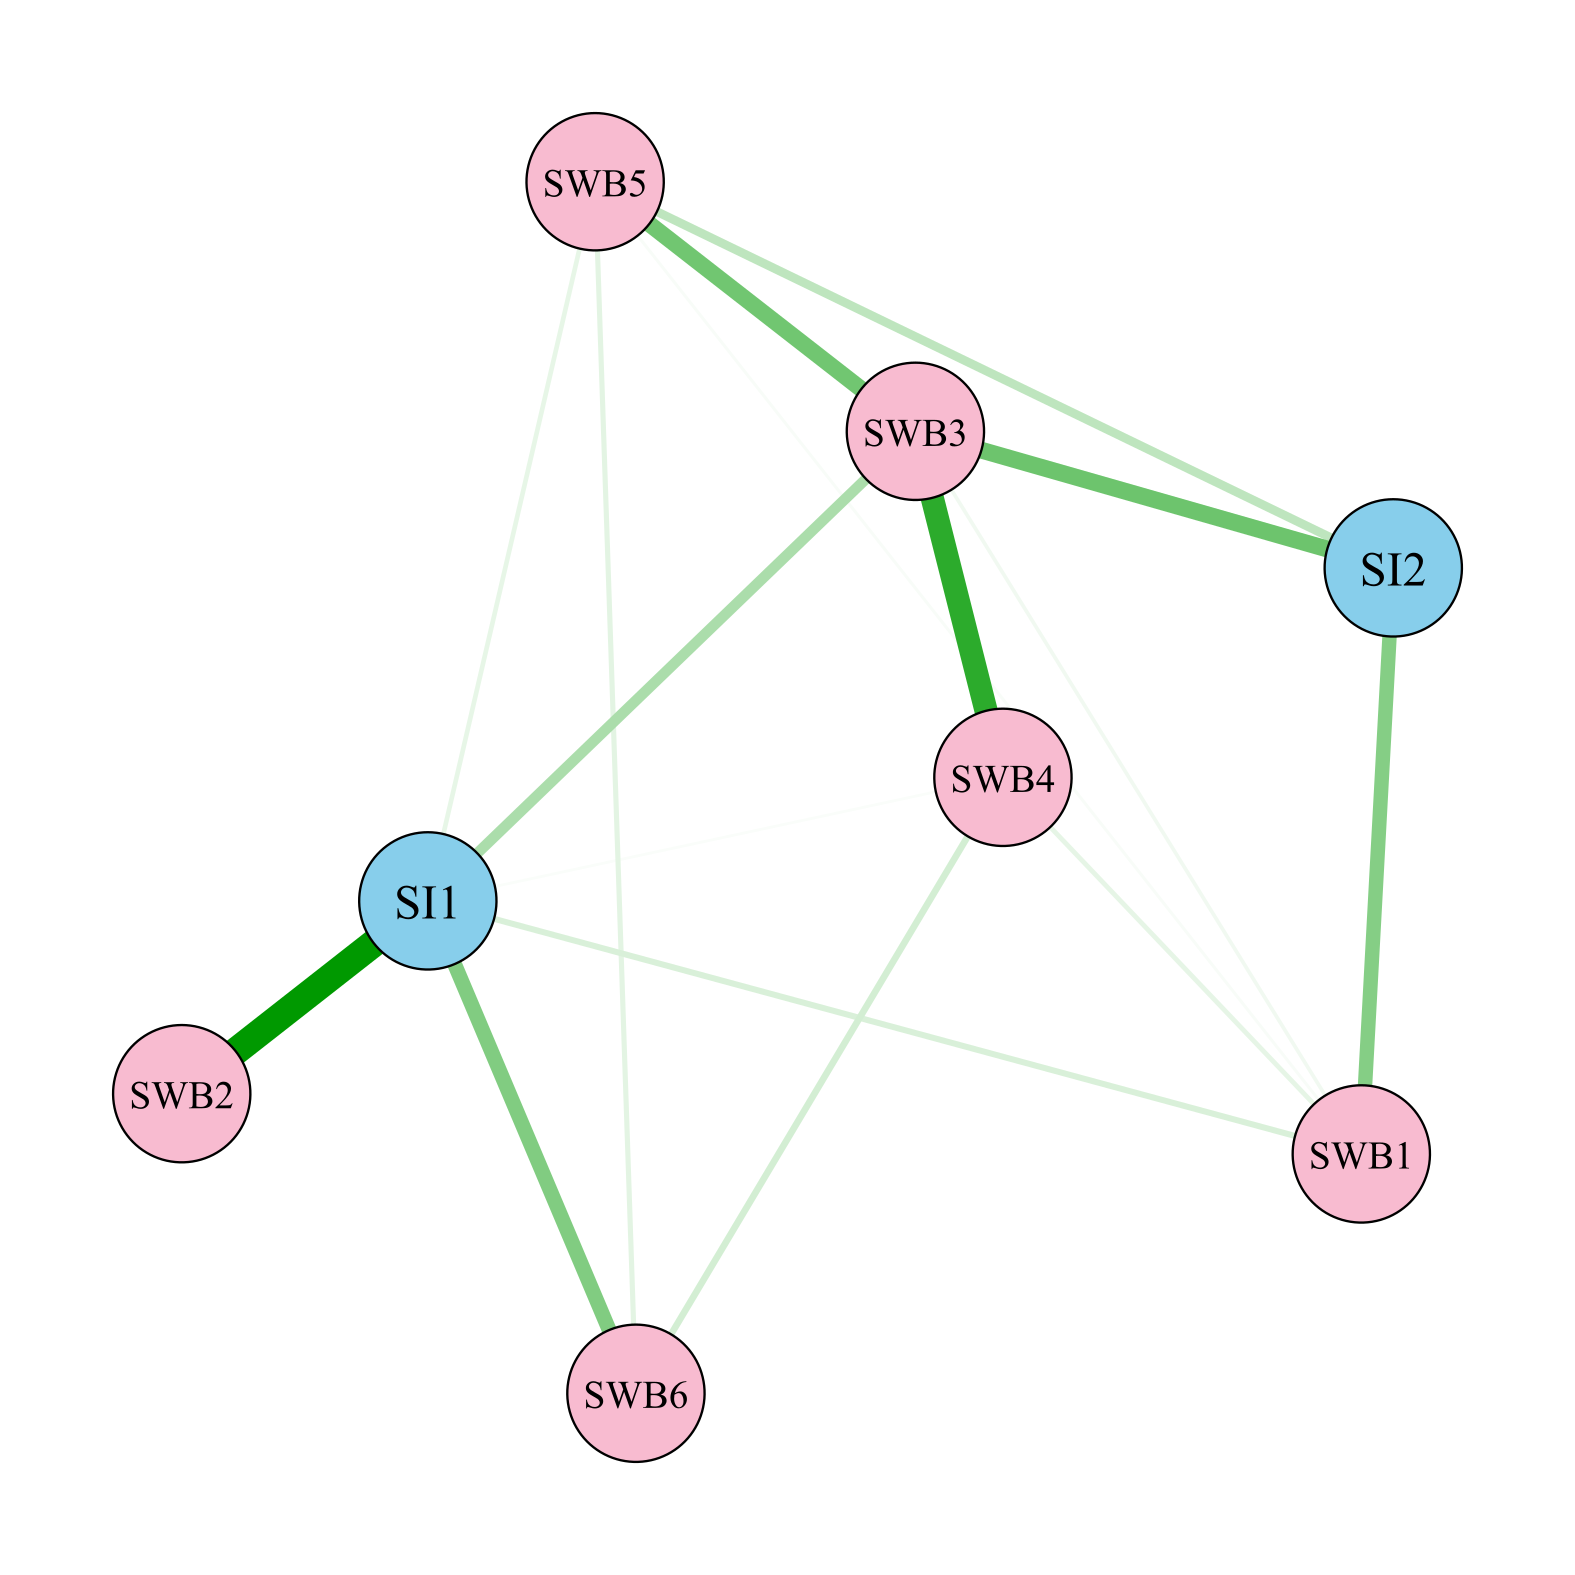


Supplementary Figure 2: Network structure of social integration and subjective well‑being among young and middle‑aged female patients with lymphoma.

Notes: SI1: Daily integration,SI2: Intimate integration;SWB1: Energy, SWB2: Relaxed or tense,SWB3: Depressed or happy mood,SWB4: Control over emotions or behaviors,SWB5: Health concerns,SWB6: Satisfaction with or interest in life.
